# Supplementary material
Source: publisher figshare collection journal article supplement (https://acs.figshare.com/ndownloader/files/16866542)
Supplement: Supplementary file 1 [file 16866542]

**Supporting Information for**

**Water Adsorption in Single- and Double-Walled Inorganic**

**Nanotubes**

*Yuan-Yuan Liao<sup>1</sup>, Pierre Picot<sup>1</sup>, Jean-Blaise Brubach<sup>2</sup>, Pascale Roy<sup>2</sup>, Antoine Thill<sup>1\*</sup> and Sophie  
Le Caër<sup>1\*</sup>*

1. LIONS, NIMBE, UMR 3685, CEA, CNRS, Université Paris-Saclay, CEA Saclay Bât.  
546, F-91191 Gif-sur-Yvette Cedex, France

2. Synchrotron SOLEIL AILES Beamline, L'Orme des Merisier, Saint-Aubin, BP 48, F-  
91192, Gif-sur-Yvette Cedex, France

\* Corresponding authors, email: [antoine.thill@cea.fr](mailto:antoine.thill@cea.fr) and [sophie.le-caer@cea.fr](mailto:sophie.le-caer@cea.fr)

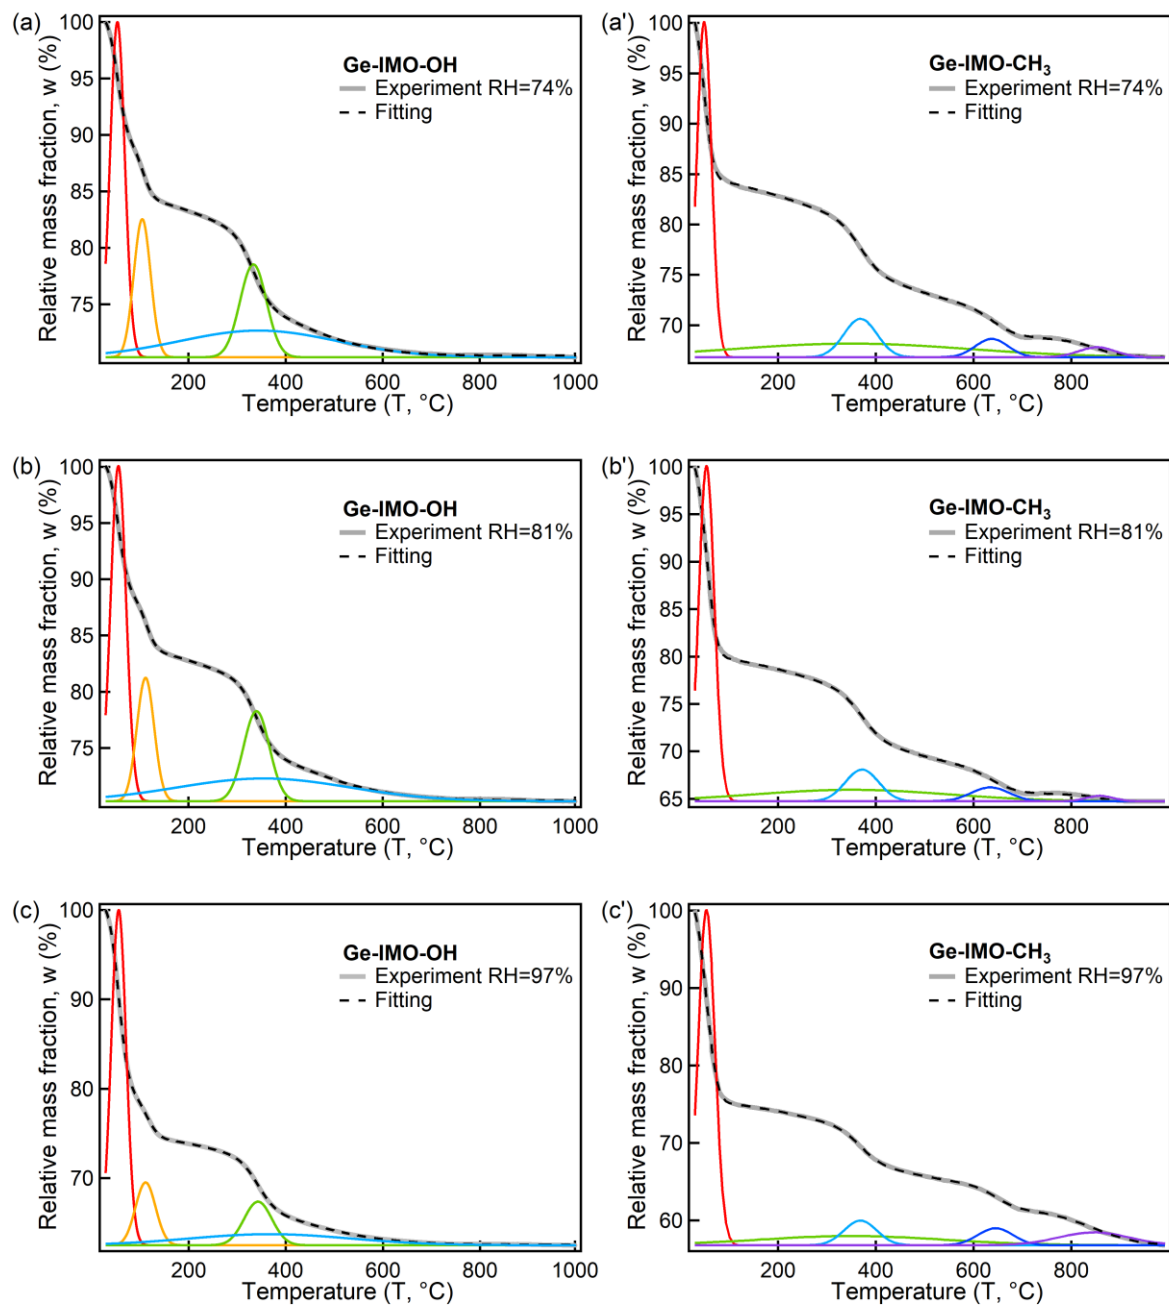

**Figure S1.** TGA curves of Ge-IMO-OH (left) and Ge-IMO-CH<sub>3</sub> (right) at three different relative humidities. The curves are displayed together with the corresponding fitting, and along with the various Gaussian components necessary for the fitting.

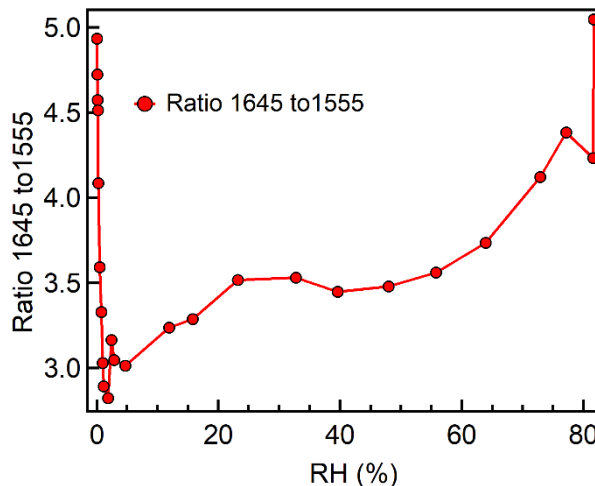

**Figure S2.** Evolution of the ratio of the  $1645\text{ cm}^{-1}$  component with the component around  $1550\text{ cm}^{-1}$  as a function of RH.

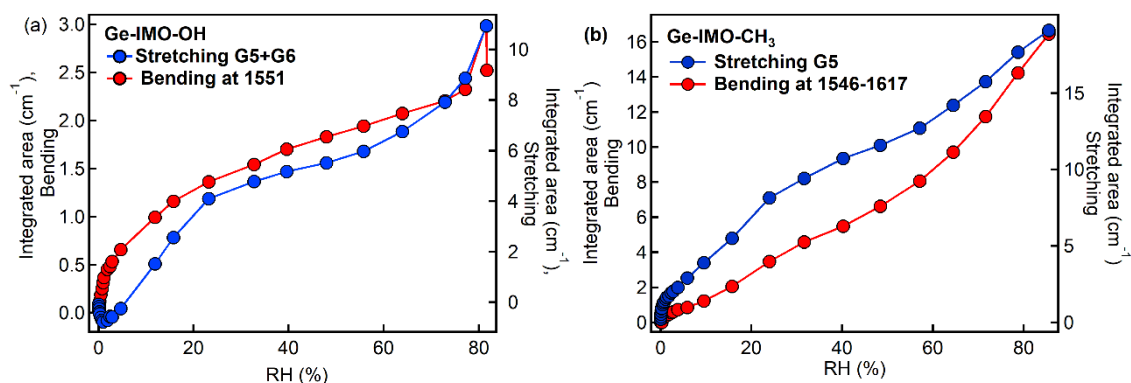

**Figure S3.** (a) Evolution of the G5 and G6 components obtained from the O-H stretching region (in blue) and of the low wavenumber component (around  $1550\text{ cm}^{-1}$ ) of the O-H bending band (in red) as a function of RH for Ge-IMO-OH. (b) Evolution of the G5 component obtained from the O-H stretching region (in blue) and of the low wavenumber component (around  $1546\text{--}1617\text{ cm}^{-1}$ ) of the O-H bending band (in red) as a function of RH for Ge-IMO-CH<sub>3</sub>.

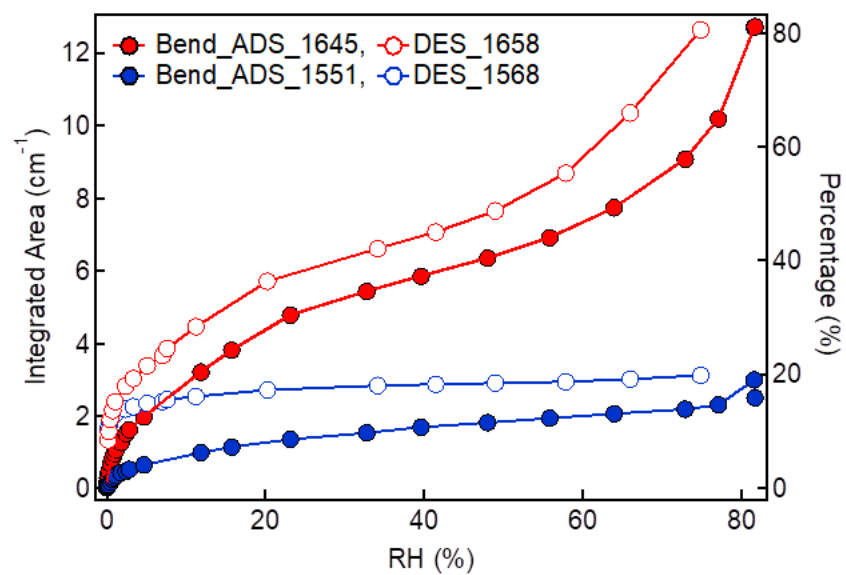

**Figure S4.** Evolution of the two bending components as a function of RH for adsorption (filled circles) and desorption (empty circles) in Ge-IMO-OH.
